# Supplementary material
Source: PubMed Central journal article supplement (PMC7709713)
Supplement: NIHMS1647465-supplement-1.pdf [file NIHMS1647465-supplement-1.pdf]

## Appendix A. Supplementary Materials

### 1. Data Comparison

Comparisons between literature data and this study are provided in Table S1 for Mo.

Literature data are generally in good agreement with this study.

### 2. Fractional Crystallization Modeling

In this study, appropriate solid metal-liquid metal  $D$  values (concentration ratios) for the HSE were calculated using the parameterization method developed by Jones and Malvin (1990) and advanced by Chabot et al. (2017):

<mi>

where  $D_0$  is the solid metal-liquid metal  $D$  value in the light-element-free Fe-Ni system experimentally determined by Chabot et al. (2017). Iron domains are calculated by:

<mi>

where  $X_S$  is the mole fraction of S in the metallic liquid,  $X_P$  is the mole fraction of P in the metallic liquid, and  $\beta_{SP}$  is a constant specific to the element being parameterized calculated by:

<mi>

where  $\beta_S$  and  $\beta_P$  are constants specific to the elements being parameterized experimentally calculated by Chabot et al. (2017). A constant  $D$  value for S of 0.001 is used and the  $D$  value for P is calculated using Eq. 1.

Liquid HSE concentration ( $C_L$ ) is calculated by:

<mi>

where  $F_n$  is the fraction of liquid and  $D_n$  is the partition coefficient of a given element

calculated at that fraction of crystallization. Solid HSE concentration ( $C_S$ ) is calculated by:

<mi>

Equations 1-5 are re-calculated for each increment of crystallization.

### 3. Tungsten-182 Correction

The IIC group and Wiley average  $\mu^{182}\text{W}$  values were corrected for nucleosynthetic W isotope variations using the method reported by Kruijjer et al. (2014). This was done by using the mean  $\mu^{183}\text{W}$  value for the IIC group and Wiley and the  $^{182/184}\text{W}$  vs.  $^{183/184}\text{W}$  (186/184 normalized) isotopic composition obtained for CAIs, which gives a slope value of  $+1.41 \pm 0.06$ .

### 4. Thermal Accretion Model

This study uses the thermal accretion model described by Kruijjer et al. (2017) and Hilton et al. (2019). In brief, the model uses the IIC group and Wiley's calculated differentiation ages and uncertainties to estimate parent body accretion ages. This model calculates temperature at a depth within a solid sphere that gains heat by  $^{26}\text{Al}$  decay. Within the model, temperature is tracked halfway to the center of the body from the surface until it reaches 1600 K, at which point differentiation is assumed to occur instantly. The parent body concentration of Al is assumed to be between 0.86-1.68 wt.%, determined from the range observed in carbonaceous chondrites (Lodders and Fegley, 1998).

---

Reference

n

$\mu^{94}\text{Mo}$

$2\sigma$

$\mu^{95}\text{Mo}$

$2\sigma$

$\mu^{97}\text{Mo}$

$2\sigma$

**Supp**

**leme**

**ntary**

**Tabl**

**es**

**Table**

**S1.**

**Com**

parison between literature Mo isotopic data and the data from this study. Data from the literature were monitored for cosmic ray exposure.

| <b>IIC Average</b>                 |   |     |    |     |    |     |    | <sup>a</sup> II |
|------------------------------------|---|-----|----|-----|----|-----|----|-----------------|
| Kruijer et al. (2017) <sup>a</sup> | 2 | 227 | 21 | 115 | 14 | 84  | 14 | C               |
| Poole et al. (2017)                | 3 | 240 | 16 | 161 | 9  | 82  | 5  | data            |
| Worsham et al. (2019)              | 4 | 225 | 10 | 156 | 7  | 83  | 7  | were            |
| This study                         | 3 | 248 | 6  | 156 | 6  | 73  | 10 | not             |
| <b>Wiley Average</b>               |   |     |    |     |    |     |    | report          |
| Kruijer et al. (2017)              | 8 | 339 | 13 | 219 | 11 | 119 | 11 | ed as           |
| Worsham et al. (2019)              | 3 | 342 | 7  | 223 | 8  | 112 | 7  | an              |
| This study                         | 2 | 356 | 11 | 230 | 5  | 118 | 2  | avera           |
|                                    |   |     |    |     |    |     |    | ge.             |
|                                    |   |     |    |     |    |     |    | These           |
|                                    |   |     |    |     |    |     |    | value           |

s were recalculated from the published data.

## Supplementary Figures

**Figure S1.** Plots of Au (ppm) versus Ga, Ge, and Ir (ppm). Solid lines represent the best fit estimates for S. Gold data for Kumerina determined by laser ablation were below detections limits.

**Figure S2a-b.** Fractional crystallization model for Re (ppb) versus Re/Os calculated for initial set of parameters defined by 4 wt.% S and 3 wt.% P (Fig. S2a) and 16 wt.% S and 1 wt.% P (Fig. S2b) concentrations. The grey area is the range of chondrites (Walker et al., 2002). The colored diamonds are the data for the IIC irons. The black line represents the solid track and the grey line represents the liquid track. The dashed grey lines show mixing curves connecting the equilibrium

solid and liquid tracks at 5% increments. The black and grey stars represent the first solid and liquid composition to form, respectively. Neither model can account for all IIC irons (Ballinoo in model A and Unter Mässing in model B).

**Figure S3a-b.** (a) Fractional crystallization model for Pt (ppb) versus Pt/Os calculated for initial S and P concentrations of 8 and 2 wt.%, respectively (Model B in the main text). (b) Fractional crystallization model for Re (ppb) versus Ru (ppb) calculated for initial S and P concentrations of 8 and 2 wt.%, respectively (Model B in the main text). In both figures, the black line represents the solid track and the grey line represents the liquid track. The dashed grey lines represent mixing curves connecting the equilibrium solid and liquid tracks at 5% increments. colored diamonds are the data for the IIC irons. The black and grey stars represent the first solid and liquid composition to form, respectively. These fractional crystallization models are in good agreement with the Re (ppb) versus Re/Os model B in the main text. For example, Unter Mässing plots on the solid track in both models, representing a solid crystallization at approximately 26% fractional crystallization.

**Figure S4.** Thermal model results for Al concentrations of 0.86, 1.20 and 1.68 wt.%. The differentiation age for the IIC group of  $3.2 \pm 0.7$  Myr after CAI formation (black solid line) corresponds to an accretion age of  $1.4 \pm 0.5$  Myr after CAI formation.

**Figure S5.** Plots of  $\mu^i\text{Mo}$  versus  $\mu^{100}\text{Ru}$  for iron meteorites using data from Table 4 and group averages reported by Bermingham et al. (2018), Worsham et al., (2019) and Hilton et al. (2019). NC type meteorites include group averages of IC, IIAB, IIIAB, IIIE, IVA and one ungrouped iron, Gebel Kamil. CC type meteorites include group averages of IID, IIF, IIIF, IVB, SBT, IIC and four ungrouped irons Wiley, Chinga, Dronino, and Tishomingo. The black lines are linear regressions calculated using *ISOPLLOT*.

**Figure S6.** Plot of Ni (wt.%) versus Ga (ppm) using data from this study, Walker et al. (2008), McCoy et al. (2011), Hilton et al. (2019), and numerous studies from the UCLA Wasson group, e.g., Scott et al. (1973), Scott and Wasson (1976), Kracher et al. (1980), and Wasson (1999). Blue symbols are the CC bodies and red symbols are the NC bodies.

### Supplementary References

Bermingham, K. R., Worsham, E. A., & Walker, R. J. (2018). New insights into Mo and Ru isotope variation in the nebula and terrestrial planet accretionary genetics. *Earth and Planetary Science Letters*, **487**, 221-229.

Chabot, N. L., Wollack, E. A., McDonough, W. F., Ash, R. D., & Saslow, S. A. (2017).

Experimental determination of partitioning in the Fe-Ni system for applications to modeling meteoritic metals. *Meteoritics & Planetary Science*, **52**(6), 1133-1145.

Dauphas, N., Davis, A. M., Marty, B., & Reisberg, L. (2004). The cosmic molybdenum–ruthenium isotope correlation. *Earth and Planetary Science Letters*, **226**(3-4), 465-475.

Hilton, C. D., Bermingham, K. R., Walker, R. J., & McCoy, T. J. (2019). Genetics, crystallization sequence, and age of the South Byron Trio iron meteorites: New insights to carbonaceous chondrite (CC) type parent bodies. *Geochimica et Cosmochimica Acta*, **251**, 217-228.

Jones, J. H., & Malvin, D. J. (1990). A nonmetal interaction model for the segregation of trace metals during solidification of Fe-Ni-S, Fe-Ni-P, and Fe-Ni-SP alloys. *Metallurgical Transactions B*, **21**(4), 697-706.

Kracher, A., Willis, J., & Wasson, J. T. (1980). Chemical classification of iron meteorites—IX. A new group (IIF), revision of IAB and III CD, and data on 57 additional irons. *Geochimica et Cosmochimica Acta*, **44**(6), 773-787.

Kruijer, T. S., Kleine, T., Fischer-Gödde, M., Burkhardt, C., & Wieler, R. (2014). Nucleosynthetic W isotope anomalies and the Hf–W chronometry of Ca–Al-rich inclusions. *Earth and Planetary Science Letters*, **403**, 317-327.

Kruijer, T. S., Burkhardt, C., Budde, G., & Kleine, T. (2017). Age of Jupiter inferred from the distinct genetics and formation times of meteorites. *Proceedings of the National Academy of Sciences*, 201704461.

Lodders K. and Fegley B. (1998) *The Planetary Scientist's Companion*. Oxford Univ Press, New York, 371 pp.

McCoy, T. J., Walker, R. J., Goldstein, J. I., Yang, J., McDonough, W. F., Rumble, D., Chabot, N. L., Ash, R. D., Corrigan, C. M., Michael, J. R., & Kotula, P. G. (2011). Group IVA

irons: New constraints on the crystallization and cooling history of an asteroidal core with a complex history. *Geochimica et Cosmochimica Acta*, **75**(22), 6821-6843.

Poole, G. M., Rehkämper, M., Coles, B. J., Goldberg, T., & Smith, C. L. (2017). Nucleosynthetic molybdenum isotope anomalies in iron meteorites—new evidence for thermal processing of solar nebula material. *Earth and Planetary Science Letters*, **473**, 215-226.

Scott, E. R., & Wasson, J. T. (1976). Chemical classification of iron meteorites—VIII. Groups IC, IIE, IIIF and 97 other irons. *Geochimica et Cosmochimica Acta*, **40**(1), 103-115.

Scott, E. R., Wasson, J. T., & Buchwald, V. F. (1973). The chemical classification of iron meteorites—VII. A reinvestigation of irons with Ge concentrations between 25 and 80 ppm. *Geochimica et Cosmochimica Acta*, **37**(8), 1957-1983.

Walker, R. J., Horan, M. F., Morgan, J. W., Becker, H., Grossman, J. N., & Rubin, A. E. (2002). Comparative  $^{187}\text{Re}$ - $^{187}\text{Os}$  systematics of chondrites: Implications regarding early solar system processes. *Geochimica et Cosmochimica Acta*, **66**(23), 4187-4201.

Walker, R. J., McDonough, W. F., Honesto, J., Chabot, N. L., McCoy, T. J., Ash, R. D., & Bellucci, J. J. (2008). Modeling fractional crystallization of group IVB iron meteorites. *Geochimica et Cosmochimica Acta*, **72**(8), 2198-2216.



Wasson, J. T. (1999). Trapped melt in IIIAB irons; solid/liquid elemental partitioning during the fractionation of the IIIAB magma. *Geochimica et Cosmochimica Acta*, **63**(18), 2875-2889.

Worsham, E. A., Burkhardt, C., Budde, G., Fischer-Gödde, M., Kruijer, T. S., & Kleine, T. (2019). Distinct evolution of the carbonaceous and non-carbonaceous reservoirs: Insights from Ru, Mo, and W isotopes. *Earth and Planetary Science Letters*, **521**, 103-112.
